# Supplementary material for: Salicylic Acid Improves the Constitutive Freezing Tolerance of Potato as Revealed by Transcriptomics and Metabolomics Analyses
Source: MDPI journal article supplement (doi:10.3390/ijms24010609), 2022-12-29
Supplement: s1 [file s1]

## Supplementary Figures

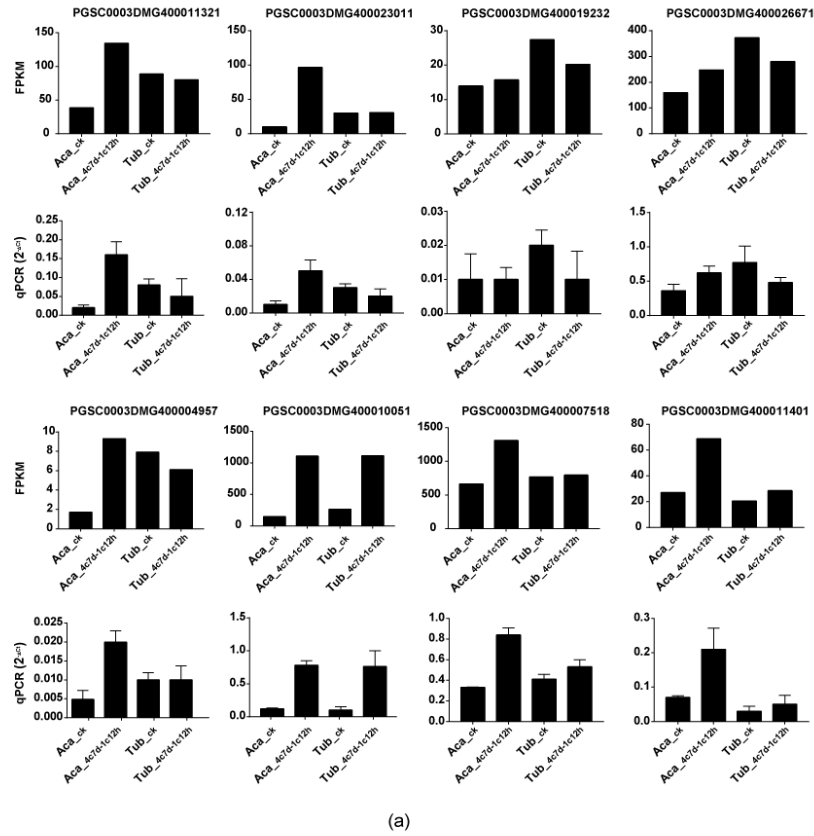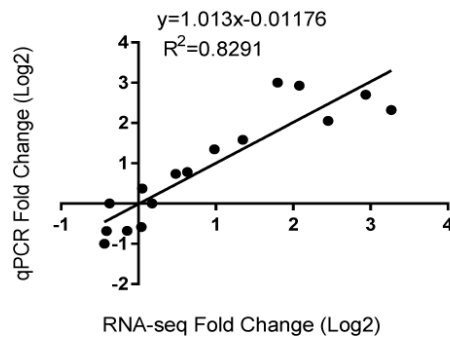

**Figure S1.** Verification of gene expression by qRT-PCR. Eight randomly selected genes are used for the analysis. FPKM: FPKM is derived by mapping RNA-seq reads to reference genome and calculating the value with cufflinks; qRT-PCR, the expression of each gene that was calculated as the 2<sup>-ΔCt</sup> value and normalized to the endogenous reference gene ef1a. QPCR data are showed as mean ± S.D. of three biological replicates.

**Supplementary Figure S2:** The enriched KEGG pathway “Arginine and proline metabolism” of up-regulated DEGs of comparison between aca and tub under −1 °C for 12 h. The pink color indicated the DEGs.

**Supplementary Figure S3:** The enriched KEGG pathway “Tyrosine metabolism” of down-regulated DEGs of comparison between aca and tub under 7 d4°C for 7 d −1 °C for 12 h. The pink color indicated the DEGs.

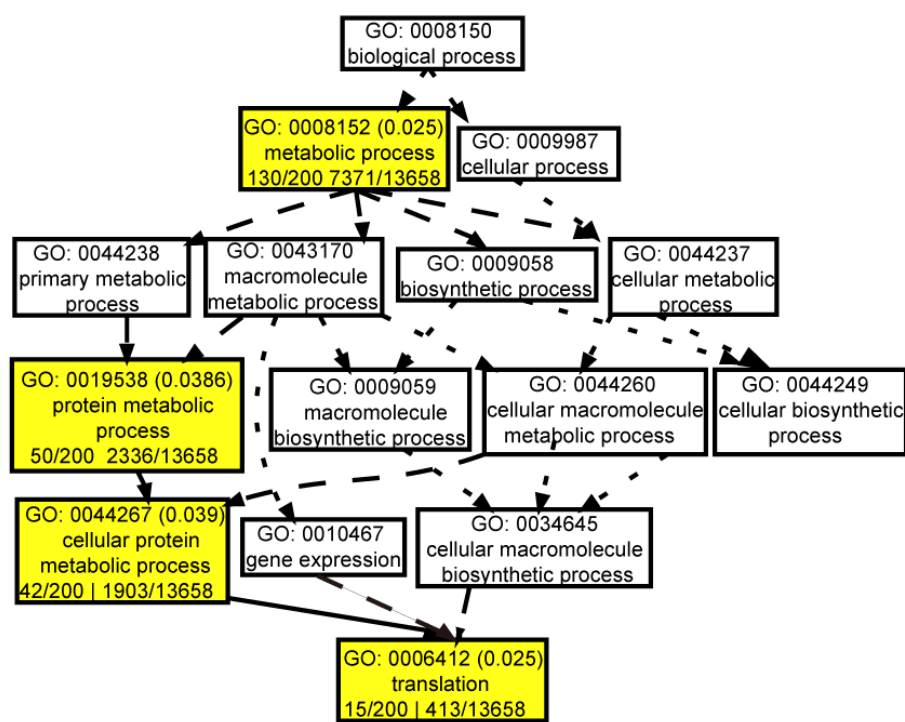

**Figure S4** Enriched GO pathways of the overlapping DEGs of aca in response to both two types of cold conditions compared with the control condition.

## Supplementary Tables

**Table S1.** Forward and reverse primer sequences of the genes used in qRT-PCR

| Gene code                        | Forward primer           | Reverse primer        |
|----------------------------------|--------------------------|-----------------------|
| PGSC0003DMG400011321             | TGGCTATAACTTCACAGATG     | AGGAATTGTTGGCTCTATG   |
| PGSC0003DMG400023011             | GTGTTGATGGAATGATAAGC     | GCATACCAAGCGTTTACTA   |
| PGSC0003DMG400019232             | ACGCTATGACTACTACTC       | CCAGGCTATCACTTAATG    |
| PGSC0003DMG400011401             | GATGGCAATAGGAAGAAGA      | CAAACAGAAGGCTGAATG    |
| PGSC0003DMG400004957             | TTGTGATGTCGGCTAACG       | GTGTTGTACGCTAACTCCA   |
| PGSC0003DMG400026671             | CATGCCTTATCTTGCGCCAC     | CCTATTGCACATTCTGCGCC  |
| PGSC0003DMG400010051             | AAACTGCTGCTCTCGATCCC     | AAGTGGCGATGTGGGTATGG  |
| PGSC0003DMG400007518             | TTTCTTTCGTCGAGCCTGGT     | CACTCAGCTGGTCCGAGAAT  |
| PGSC0003DMG400014310<br>(CBF1)   | CGTACTCAGTATTTGGATGGTACG | TTCCTCTCACTGCCCAAACC  |
| PGSC0003DMG400000380<br>(HSFC1)  | TGCGATCTGTCAGTCCTCTC     | TTCGCGTCAGGAGATCGAAT  |
| PGSC0003DMG400022823<br>(ERF11)  | CGATGAATTACCGAAACAGGAAGT | TCTTCGATCCATCGCTGTTCT |
| PGSC0003DMG400019824<br>(WRKY40) | CTGTTGAATCGTCGAGTCCG     | TGGTTAAACCCGCCGATTG   |

**Table S2.** Summary of transcriptome sequencing data

| Samples <sup>1</sup>       | Number of raw reads | Number of clean reads (% <sup>2</sup> ) | Number of mapped reads (% <sup>3</sup> ) | Q30(%) |
|----------------------------|---------------------|-----------------------------------------|------------------------------------------|--------|
| Tub 4 °C 7d -1 °C 12h_rep1 | 10,053,630          | 8,867,562 (88.2)                        | 6,943,301 (78.3)                         | 94.0   |
| Tub 4 °C 7d -1 °C 12h_rep2 | 10,378,798          | 9,115,858 (87.8)                        | 7,520,583 (82.5)                         | 94.5   |
| Tub 4 °C 7d -1 °C 12h_rep3 | 11,448,922          | 10,212,698 (89.2)                       | 8,609,304 (84.3)                         | 94.6   |
| Aca 4 °C 7d -1 °C 12h_rep1 | 9,718,730           | 9,439,726 (97.1)                        | 7,655,618 (81.1)                         | 94.8   |
| Aca 4 °C 7d -1 °C 12h_rep2 | 10,432,182          | 10,122,340 (97.0)                       | 8,178,851 (80.8)                         | 94.5   |
| Aca 4 °C 7d -1 °C 12h_rep3 | 10,780,568          | 10,368,478 (96.2)                       | 8,325,888 (80.3)                         | 94.8   |
| Average                    | 10,468,805          | 9,687,777 (92.5)                        | 7,872,257 (81.3)                         | 94.5   |

<sup>1</sup> Tub 4 °C 7d -1 °C 12h and Aca 4 °C 7d -1 °C 12h indicate samples of *Tub* and *Aca* exposed to 4 °C for seven days and the following -1 °C for 12h, respectively

<sup>2</sup> percentage = number of clean reads / number of all reads × 100

<sup>3</sup> percentage = number of mapped reads / number of clean reads × 100

**Table S3.** The raw data of GC-MS and enzyme linked immunosorbent assay evaluated metabolites

**Table S4.** Gene list of the enriched GO molecular function term “transcription activity” of tub with exogenous application of SA after exposure to cold condition comparing with control condition

| Gene code              | Gene annotation          | GO annotation                              |
|------------------------|--------------------------|--------------------------------------------|
| Soltu.DM.12<br>G024950 | HSFC1                    | GO:0003700 transcription factor activity   |
|                        |                          | GO:0043565 sequence-specific DNA binding   |
|                        |                          | GO:0005634 nucleus                         |
|                        |                          | GO:0042025 host cell nucleus               |
| Soltu.DM.10<br>G005000 | ERF11                    | GO:0003700 transcription factor activity   |
|                        |                          | GO:0005634 nucleus                         |
|                        |                          | GO:0003677 DNA binding                     |
| Soltu.DM.03<br>G030960 | WRKY40                   | GO:0003700 transcription factor activity   |
|                        |                          | GO:0043565 sequence-specific DNA binding   |
|                        |                          | GO:0005634 nucleus                         |
| Soltu.DM.05<br>G026450 | WRKY DNA-binding protein | GO:0003700 transcription factor activity   |
|                        |                          | GO:0043565 sequence-specific DNA binding   |
|                        |                          | GO:0005634 nucleus                         |
| Soltu.DM.01<br>G041210 | myb domain protein       | GO:0044212 DNA regulatory region binding   |
|                        |                          | GO:0043565 sequence-specific DNA binding   |
|                        |                          | GO:0003700 transcription factor activity   |
|                        |                          | GO:0005634 nucleus                         |
|                        |                          | GO:0030154 cell differentiation            |
|                        |                          | GO:0010119 regulation of stomatal movement |
|                        |                          | GO:0003677 DNA binding                     |

|                        |                                            |                                                                                        |
|------------------------|--------------------------------------------|----------------------------------------------------------------------------------------|
| Soltu.DM.02<br>G031730 | myb domain protein                         | GO:0009733 response to auxin stimulus                                                  |
|                        |                                            | GO:0044212 DNA regulatory region binding                                               |
|                        |                                            | GO:0009617 response to bacterium                                                       |
|                        |                                            | GO:0043565 sequence-specific DNA binding                                               |
|                        |                                            | GO:0003700 transcription factor activity                                               |
|                        |                                            | GO:0005634 nucleus                                                                     |
|                        |                                            | GO:0030154 cell differentiation                                                        |
|                        |                                            | GO:0009626 plant-type hypersensitive response                                          |
|                        |                                            | GO:0003677 DNA binding                                                                 |
|                        |                                            | GO:0001666 response to hypoxia                                                         |
| Soltu.DM.12<br>G007270 | bZIP transcription factor family protein   | GO:0003700 transcription factor activity                                               |
|                        |                                            | GO:0043565 sequence-specific DNA binding                                               |
|                        |                                            | GO:0006351 transcription, DNA-dependent                                                |
| Soltu.DM.06<br>G028040 | sigma factor A                             | GO:0003700 transcription factor activity                                               |
|                        |                                            | GO:0006352 transcription initiation                                                    |
| Soltu.DM.06<br>G009910 | HXXXD-type acyl-transferase family protein | GO:0003700 transcription factor activity                                               |
|                        |                                            | GO:0005634 nucleus                                                                     |
|                        |                                            | GO:0016747 transferase activity, transferring acyl groups other than amino-acyl groups |
|                        |                                            | GO:0003677 DNA binding                                                                 |
| Soltu.DM.04<br>G029170 | related to AP2                             | GO:0003700 transcription factor activity                                               |
|                        |                                            | GO:0043565 sequence-specific DNA binding                                               |
|                        |                                            | GO:0005634 nucleus                                                                     |
|                        |                                            | GO:0003677 DNA binding                                                                 |
| Soltu.DM.11<br>G025890 | related to AP2.7                           | GO:0003700 transcription factor activity                                               |
|                        |                                            | GO:0005634 nucleus                                                                     |
|                        |                                            | GO:0003677 DNA binding                                                                 |

|                        |                                                |                                            |
|------------------------|------------------------------------------------|--------------------------------------------|
| Soltu.DM.08<br>G015040 | Integrase-type DNA-binding superfamily protein | GO:0003700 transcription factor activity   |
|                        |                                                | GO:0005634 nucleus                         |
|                        |                                                | GO:0003677 DNA binding                     |
| Soltu.DM.03<br>G030200 | myb domain protein                             | GO:0009733 response to auxin stimulus      |
|                        |                                                | GO:0044212 DNA regulatory region binding   |
|                        |                                                | GO:0043565 sequence-specific DNA binding   |
|                        |                                                | GO:0003700 transcription factor activity   |
|                        |                                                | GO:0005634 nucleus                         |
|                        |                                                | GO:0030154 cell differentiation            |
| Soltu.DM.07<br>G023850 | TCP family transcription factor                | GO:0003700 transcription factor activity   |
|                        |                                                | GO:0043565 sequence-specific DNA binding   |
|                        |                                                | GO:0005634 nucleus                         |
|                        |                                                | GO:0048831 regulation of shoot development |
| Soltu.DM.04<br>G000120 | myb-like transcription factor family protein   | GO:0003700 transcription factor activity   |
|                        |                                                | GO:0005634 nucleus                         |
|                        |                                                | GO:0008270 zinc ion binding                |
|                        |                                                | GO:0003677 DNA binding                     |
|                        |                                                | GO:0003682 chromatin binding               |
| Soltu.DM.08<br>G002290 | WRKY DNA-binding protein                       | GO:0003700 transcription factor activity   |
|                        |                                                | GO:0043565 sequence-specific DNA binding   |
|                        |                                                | GO:0005634 nucleus                         |
|                        |                                                |                                            |
| Soltu.DM.06<br>G020280 | TCP family transcription factor                | GO:0003700 transcription factor activity   |
|                        |                                                | GO:0043565 sequence-specific DNA binding   |
|                        |                                                | GO:0005634 nucleus                         |

|                        |                                                |                                                       |
|------------------------|------------------------------------------------|-------------------------------------------------------|
| Soltu.DM.06<br>G025970 | myb domain protein                             | GO:0009733 response to auxin stimulus                 |
|                        |                                                | GO:0044212 DNA regulatory region binding              |
|                        |                                                | GO:0043565 sequence-specific DNA binding              |
|                        |                                                | GO:0003700 transcription factor activity              |
|                        |                                                | GO:0005634 nucleus                                    |
|                        |                                                | GO:0030154 cell differentiation                       |
|                        |                                                | GO:0003677 DNA binding                                |
| Soltu.DM.08<br>G004690 | WRKY family transcription factor               | GO:0003700 transcription factor activity              |
|                        |                                                | GO:0044212 DNA regulatory region binding              |
|                        |                                                | GO:0005634 nucleus                                    |
|                        |                                                | GO:0043565 sequence-specific DNA binding              |
| Soltu.DM.05<br>G003020 | Integrase-type DNA-binding superfamily protein | GO:0003700 transcription factor activity              |
|                        |                                                | GO:0005634 nucleus                                    |
|                        |                                                | GO:0003677 DNA binding                                |
| Soltu.DM.10<br>G024000 | C2H2-like zinc finger protein                  | GO:0003700 transcription factor activity              |
|                        |                                                | GO:0005634 nucleus                                    |
|                        |                                                | GO:0046872 metal ion binding                          |
|                        |                                                | GO:0003676 nucleic acid binding                       |
| Soltu.DM.03<br>G022850 | sigma factor E                                 | GO:0003700 transcription factor activity              |
|                        |                                                | GO:0006352 transcription initiation                   |
| Soltu.DM.02<br>G025460 | GRAS family transcription factor               | GO:0043565 sequence-specific DNA binding              |
|                        |                                                | GO:0003700 transcription factor activity              |
|                        |                                                | GO:0005634 nucleus                                    |
|                        |                                                | GO:0030154 cell differentiation                       |
|                        |                                                | GO:0006355 regulation of transcription, DNA-dependent |
|                        |                                                | GO:0048831 regulation of shoot development            |



|                        |                                  |                                                       |
|------------------------|----------------------------------|-------------------------------------------------------|
| Soltu.DM.02<br>G031630 | cycling DOF factor               | GO:0003700 transcription factor activity              |
|                        |                                  | GO:0006355 regulation of transcription, DNA-dependent |
|                        |                                  | GO:0005634 nucleus                                    |
|                        |                                  | GO:0003677 DNA binding                                |
| Soltu.DM.12<br>G022800 | erf domain protein               | GO:0003700 transcription factor activity              |
|                        |                                  | GO:0006952 defense response                           |
|                        |                                  | GO:0005634 nucleus                                    |
|                        |                                  | GO:0009873 ethylene mediated signaling pathway        |
| Soltu.DM.02<br>G027840 | GRAS family transcription factor | GO:0003700 transcription factor activity              |
|                        |                                  | GO:0006355 regulation of transcription, DNA-dependent |
|                        |                                  | GO:0005634 nucleus                                    |
|                        |                                  | GO:0043565 sequence-specific DNA binding              |
| Soltu.DM.03<br>G027860 | Calmodulin binding protein-like  | GO:0003700 transcription factor activity              |
|                        |                                  | GO:0043565 sequence-specific DNA binding              |
|                        |                                  | GO:0005634 nucleus                                    |
|                        |                                  | GO:0005516 calmodulin binding                         |
| Soltu.DM.10<br>G023760 | WRKY DNA-binding protein         | GO:0003700 transcription factor activity              |
|                        |                                  | GO:0043565 sequence-specific DNA binding              |
|                        |                                  | GO:0005634 nucleus                                    |
|                        |                                  |                                                       |
| Soltu.DM.02<br>G031540 | myb domain protein               | GO:0044212 DNA regulatory region binding              |
|                        |                                  | GO:0043565 sequence-specific DNA binding              |
|                        |                                  | GO:0003700 transcription factor activity              |
|                        |                                  | GO:0005634 nucleus                                    |
|                        |                                  | GO:0030154 cell differentiation                       |
|                        |                                  | GO:0003677 DNA binding                                |

|                        |                                                               |                                                                    |
|------------------------|---------------------------------------------------------------|--------------------------------------------------------------------|
| Soltu.DM.09<br>G030640 | basic helix-loop-helix (bHLH) DNA-binding superfamily protein | GO:0003700 transcription factor activity                           |
|                        |                                                               | GO:0006355 regulation of transcription, DNA-dependent              |
|                        |                                                               | GO:0005634 nucleus                                                 |
|                        |                                                               | GO:0046983 protein dimerization activity                           |
| Soltu.DM.05<br>G019830 | G-box binding factor                                          | GO:0003700 transcription factor activity                           |
|                        |                                                               | GO:0006355 regulation of transcription, DNA-dependent              |
|                        |                                                               | GO:0005634 nucleus                                                 |
|                        |                                                               | GO:0043565 sequence-specific DNA binding                           |
| Soltu.DM.08<br>G028970 | Integrase-type DNA-binding superfamily protein                | GO:0003700 transcription factor activity                           |
|                        |                                                               | GO:0005634 nucleus                                                 |
|                        |                                                               | GO:0003677 DNA binding                                             |
| Soltu.DM.03<br>G029900 | CCT motif -containing response regulator protein              | GO:0007623 circadian rhythm                                        |
|                        |                                                               | GO:0003700 transcription factor activity                           |
|                        |                                                               | GO:0000160 two-component signal transduction system (phosphorelay) |
|                        |                                                               | GO:0005634 nucleus                                                 |
|                        |                                                               | GO:0010629 negative regulation of gene expression                  |
|                        |                                                               | GO:0003677 DNA binding                                             |
| Soltu.DM.07<br>G025300 | GRAS family transcription factor                              | GO:0003700 transcription factor activity                           |
|                        |                                                               | GO:0006355 regulation of transcription, DNA-dependent              |
|                        |                                                               | GO:0005634 nucleus                                                 |
|                        |                                                               | GO:0043565 sequence-specific DNA binding                           |
| Soltu.DM.05<br>G005140 | cycling DOF factor                                            | GO:0003700 transcription factor activity                           |
|                        |                                                               | GO:0006355 regulation of transcription, DNA-dependent              |
|                        |                                                               | GO:0005634 nucleus                                                 |
|                        |                                                               | GO:0003677 DNA binding                                             |
| Soltu.DM.04<br>G035840 | basic leucine-zipper                                          | GO:0003700 transcription factor activity                           |
|                        |                                                               | GO:0044212 DNA regulatory region binding                           |

|                        |                                                                 |                                                                |
|------------------------|-----------------------------------------------------------------|----------------------------------------------------------------|
|                        |                                                                 | GO:0005634 nucleus                                             |
|                        |                                                                 | GO:0045893 positive regulation of transcription, DNA-dependent |
|                        |                                                                 | GO:0043565 sequence-specific DNA binding                       |
| Soltu.DM.06<br>G030980 | related to AP2.7                                                | GO:0003700 transcription factor activity                       |
|                        |                                                                 | GO:0005634 nucleus                                             |
|                        |                                                                 | GO:0003677 DNA binding                                         |
| Soltu.DM.04<br>G019860 | Integrase-type DNA-binding superfamily protein                  | GO:0044212 DNA regulatory region binding                       |
|                        |                                                                 | GO:0043565 sequence-specific DNA binding                       |
|                        |                                                                 | GO:0003700 transcription factor activity                       |
|                        |                                                                 | GO:0005634 nucleus                                             |
|                        |                                                                 | GO:0045893 positive regulation of transcription, DNA-dependent |
|                        |                                                                 | GO:0003677 DNA binding                                         |
| Soltu.DM.10<br>G003970 | GOLDEN2-like / GBF's pro-rich region-interacting factor         | GO:0003700 transcription factor activity                       |
|                        |                                                                 | GO:0044212 DNA regulatory region binding                       |
|                        |                                                                 | GO:0005634 nucleus                                             |
|                        |                                                                 | GO:0045893 positive regulation of transcription, DNA-dependent |
|                        |                                                                 | GO:0003677 DNA binding                                         |
| Soltu.DM.08<br>G011730 | Basic-leucine zipper (bZIP) transcription factor family protein | GO:0010099 regulation of photomorphogenesis                    |
|                        |                                                                 | GO:0009585 red, far-red light phototransduction                |
|                        |                                                                 | GO:0003700 transcription factor activity                       |
|                        |                                                                 | GO:0005634 nucleus                                             |
|                        |                                                                 | GO:0010017 red or far-red light signaling pathway              |
|                        |                                                                 | GO:0010218 response to far red light                           |
|                        |                                                                 | GO:0003677 DNA binding                                         |
|                        |                                                                 | GO:0010114 response to red light                               |
| Soltu.DM.10<br>G005890 | WRKY family transcription factor                                | GO:0003700 transcription factor activity                       |
|                        |                                                                 | GO:0044212 DNA regulatory region binding                       |
|                        |                                                                 | GO:0005634 nucleus                                             |
|                        |                                                                 | GO:0043565 sequence-specific DNA binding                       |

|                        |                                                               |                                                                |
|------------------------|---------------------------------------------------------------|----------------------------------------------------------------|
| Soltu.DM.03<br>G033680 | Calmodulin binding<br>protein-like                            | GO:0003700 transcription factor activity                       |
|                        |                                                               | GO:0043565 sequence-specific DNA binding                       |
|                        |                                                               | GO:0005634 nucleus                                             |
|                        |                                                               | GO:0005516 calmodulin binding                                  |
|                        |                                                               | GO:0080142 regulation of salicylic acid biosynthetic process   |
| Soltu.DM.08<br>G028690 | cytokinin response factor                                     | GO:0003700 transcription factor activity                       |
|                        |                                                               | GO:0005634 nucleus                                             |
|                        |                                                               | GO:0003677 DNA binding                                         |
| Soltu.DM.04<br>G023540 | WRKY DNA-binding<br>protein                                   | GO:0003700 transcription factor activity                       |
|                        |                                                               | GO:0043565 sequence-specific DNA binding                       |
|                        |                                                               | GO:0005634 nucleus                                             |
| Soltu.DM.12<br>G007120 | related to AP2                                                | GO:0003700 transcription factor activity                       |
|                        |                                                               | GO:0043565 sequence-specific DNA binding                       |
|                        |                                                               | GO:0005634 nucleus                                             |
|                        |                                                               | GO:0003677 DNA binding                                         |
| Soltu.DM.01<br>G034750 | WRKY family transcription<br>factor                           | GO:0003700 transcription factor activity                       |
|                        |                                                               | GO:0044212 DNA regulatory region binding                       |
|                        |                                                               | GO:0005634 nucleus                                             |
|                        |                                                               | GO:0043565 sequence-specific DNA binding                       |
| Soltu.DM.07<br>G020230 | GOLDEN2-like /GBF's pro-<br>rich region-interacting<br>factor | GO:0003700 transcription factor activity                       |
|                        |                                                               | GO:0044212 DNA regulatory region binding                       |
|                        |                                                               | GO:0005634 nucleus                                             |
|                        |                                                               | GO:0045893 positive regulation of transcription, DNA-dependent |
|                        |                                                               | GO:0003677 DNA binding                                         |
| Soltu.DM.01<br>G027400 | nuclear factor Y, subunit A1                                  | GO:0003700 transcription factor activity                       |
|                        |                                                               | GO:0006355 regulation of transcription, DNA-dependent          |
|                        |                                                               | GO:0005634 nucleus                                             |

---

|                        |                                                       |                                                                                                                                                                                                 |
|------------------------|-------------------------------------------------------|-------------------------------------------------------------------------------------------------------------------------------------------------------------------------------------------------|
|                        |                                                       | GO:0016602 CCAAT-binding factor complex                                                                                                                                                         |
|                        |                                                       | GO:0003677 DNA binding                                                                                                                                                                          |
| Soltu.DM.06<br>G026030 | TEOSINTE BRANCHED,<br>cycloidea and PCF (TCP)         | GO:0003700 transcription factor activity<br>GO:0043565 sequence-specific DNA binding<br>GO:0005634 nucleus                                                                                      |
| Soltu.DM.01<br>G031210 | Integrase-type DNA-<br>binding superfamily<br>protein | GO:0003700 transcription factor activity<br>GO:0005634 nucleus<br>GO:0003677 DNA binding                                                                                                        |
| Soltu.DM.02<br>G009620 | cycling DOF factor                                    | GO:0003700 transcription factor activity<br>GO:0006355 regulation of transcription, DNA-dependent<br>GO:0005634 nucleus<br>GO:0003677 DNA binding                                               |
| Soltu.DM.12<br>G012100 | BR enhanced expression                                | GO:0003700 transcription factor activity<br>GO:0006355 regulation of transcription, DNA-dependent<br>GO:0005634 nucleus<br>GO:0046983 protein dimerization activity                             |
| Soltu.DM.07<br>G020090 | erf domain protein                                    | GO:0009536 plastid<br>GO:0003700 transcription factor activity<br>GO:0005634 nucleus<br>GO:0009873 ethylene mediated signaling pathway<br>GO:0006952 defense response<br>GO:0003677 DNA binding |

---
